# Supplementary material for: The missing voices of Indigenous Australians in the social, cultural and historical experiences of tuberculosis: a systematic and integrative review
Source: PubMed Central journal article supplement — BMJ Glob Health. 2019 Nov 14;4(6):e001794. doi: 10.1136/bmjgh-2019-001794 (PMC6861081; doi:10.1136/bmjgh-2019-001794), 2019-11-14
Supplement: bmjgh-2019-001794supp002.pdf [file bmjgh-2019-001794supp002.pdf]

## Summary of records reviewed

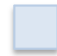

Category: Commentary on TB history, TB experience and approaches to TB control

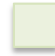

Category: Descriptive epidemiology

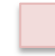

Category: Qualitative research

| No. | Reference                             | Name of publication                                                  | Year | Geographic location          | Description of publication                                                                                                                                                                                                         | Categorisation                                                       | Contribution to construction of themes                                                                                           |
|-----|---------------------------------------|----------------------------------------------------------------------|------|------------------------------|------------------------------------------------------------------------------------------------------------------------------------------------------------------------------------------------------------------------------------|----------------------------------------------------------------------|----------------------------------------------------------------------------------------------------------------------------------|
| 1   | Kingsmill JW [68]                     | Beltana                                                              | 1886 | South Australia              | Book chapter reporting an Anthropologists' descriptions of the language groups residing two groups in the Central Division in Beltana country in South Australia. Includes observations on the impact of TB on the groups studied. | Commentary on TB history, TB experience and approaches to TB control | TB is a Balanda disease: <i>Invasion</i>                                                                                         |
| 2   | King A, Edwards G, Gibson P [106]     | A survey of Australian aborigines for pulmonary tuberculosis         | 1951 | North-west Western Australia | Journal paper, regional report on a survey of TB among Indigenous Australians in 1950                                                                                                                                              | Descriptive epidemiology                                             | TB control is complex: <i>Biomedical health models</i>                                                                           |
| 3   | Tennant K [67]                        | The function of Christian missions                                   | 1956 | Australia                    | Government newsletter describing the role of missions to assist "native people towards a better and more Christian way of life" that refers to the management of TB for people living on a mission in 1956.                        | Commentary on TB history, TB experience and approaches to TB control | TB is a Balanda disease: <i>Theft and loss of family and culture.</i><br>TB control is complex: <i>Biomedical health models.</i> |
| 4   | Watsford SD [104]                     | Mantoux survey of full-blooded aborigines in the Northern Territory  | 1956 | Northern Territory           | Journal paper, territory report on the survey of TB among Indigenous Australians 1951-1956.                                                                                                                                        | Descriptive epidemiology                                             | TB control is complex: <i>Biomedical health models</i>                                                                           |
| 5   | Edwards FG, Harris KW, Slade SE [107] | Six year follow-up Mantoux survey of aborigines in Western Australia | 1957 | North-west Western Australia | Journal paper, regional TB report of a survey of TB among Indigenous Australians in 1956.                                                                                                                                          | Descriptive epidemiology                                             | TB control is complex: <i>Biomedical health models</i>                                                                           |

|    |                                                                       |                                                                              |      |                                                          |                                                                                                                                                                                        |                                                                      |                                                                                                                                                                   |
|----|-----------------------------------------------------------------------|------------------------------------------------------------------------------|------|----------------------------------------------------------|----------------------------------------------------------------------------------------------------------------------------------------------------------------------------------------|----------------------------------------------------------------------|-------------------------------------------------------------------------------------------------------------------------------------------------------------------|
| 6  | Christophers BE [41]                                                  | Discrimination in an unexpected quarter                                      | 1964 | Australia                                                | Letter to the editor of MJA in the campaign to end the discriminatory clauses for Indigenous Australians in the Tuberculosis Act of 1948.                                              | Commentary on TB history, TB experience and approaches to TB control | TB is Balanda disease: <i>Racism</i> .                                                                                                                            |
| 7  | Cook CEA [48]                                                         | Notable changes in the incidence of disease in Northern Territory Aborigines | 1970 | Northern Territory                                       | Book chapter ,commentary on the impact of infectious diseases including TB for Indigenous Australians 1824-1960.                                                                       | Commentary on TB history, TB experience and approaches to TB control | TB is Balanda disease: <i>Invasion; Racism</i> . TB control is complex: <i>Indigenous health models; Biomedical health models</i> .                               |
| 8  | Maxwell GM. [117]                                                     | Chronic chest disease in Australian aboriginal children                      | 1972 | Southern Northern Territory and Northern South Australia | Journal paper, report on chronic chest disease in Australian Indigenous children (no dates).                                                                                           | Descriptive epidemiology                                             | TB control is complex: <i>Biomedical health models</i>                                                                                                            |
| 9  | Abrahams EW [109]                                                     | Tuberculosis in indigenous Australians                                       | 1975 | Australia                                                | Journal paper, comparing manifestations of TB in Indigenous and non-Indigenous Australians in the early 1970s.                                                                         | Descriptive epidemiology                                             | TB control is complex: <i>Biomedical health models</i>                                                                                                            |
| 10 | Soong FS [53]                                                         | Tuberculosis and the Aboriginal Territorian                                  | 1976 | Northern Territory                                       | Journal paper, commentary on TB and Indigenous Australians in the Northern Territory.                                                                                                  | Commentary on TB history, TB experience and approaches to TB control | TB is a Balanda disease: <i>Invasion; Racism</i> . TB control is complex: <i>Indigenous health models</i> .                                                       |
| 11 | Puautjimi F, Puruntatameri AM, Tipiloura M, Tipiloura E, Kelly S [66] | A Tiwi Lady's Tale                                                           | 1978 | Tiwi Islands                                             | Narrative by a Tiwi Island resident (Florrie) who was paralysed by spinal TB and returned to her community. Florrie and Aboriginal health Workers from Bathurst Island tell her story. | Commentary on TB history, TB experience and approaches to TB control | TB is Balanda disease: <i>Racism</i> . Community participation and solidarity. TB Control is complex: <i>Indigenous health models; Biomedical health models</i> . |
| 12 | Penny M, Thompson NA [88]                                             | A preliminary analysis of Aboriginal tuberculosis, 1984                      | 1987 | Australia                                                | Journal paper, epidemiology of TB in Indigenous Australians 1984.                                                                                                                      | Descriptive epidemiology                                             | TB control is complex: <i>Biomedical health models</i>                                                                                                            |
| 13 | Mulholland E, Gilbert G, Kempster R. [118]                            | Childhood tuberculosis in Victoria, 1970-86                                  | 1989 | Victoria                                                 | Journal paper, state-wide review of children diagnosed with TB 1970-1986.                                                                                                              | Descriptive epidemiology                                             | TB control is complex: <i>Biomedical health models</i>                                                                                                            |

|    |                                                                        |                                                                        |      |                      |                                                                                                                                                                                   |                                                                      |                                                                                                                                      |
|----|------------------------------------------------------------------------|------------------------------------------------------------------------|------|----------------------|-----------------------------------------------------------------------------------------------------------------------------------------------------------------------------------|----------------------------------------------------------------------|--------------------------------------------------------------------------------------------------------------------------------------|
| 14 | Patel A, Streeton R [69]                                               | Tuberculosis in Australia and New Zealand into the 1990's              | 1990 | Australia            | Book, guideline for health care workers in the diagnosis and treatment of tuberculosis. Chapter 14 discusses and recommends management of tuberculosis in Indigenous Australians. | Commentary on TB history, TB experience and approaches to TB control | TB control is complex: <i>Biomedical health models</i>                                                                               |
| 15 | Beilby J, Reed J, Baker J, Wilson K, Sansbury M, Antic R, et al. [108] | Tuberculosis surveillance in the South Australian aboriginal community | 1990 | South Australia      | Journal paper, report on TB infection in four Aboriginal communities 1978-1988.                                                                                                   | Descriptive epidemiology                                             | TB control is complex: <i>Biomedical health models</i>                                                                               |
| 16 | Abrahams [55]                                                          | Tuberculosis in Indigenous Australians                                 | 1991 | Australia            | Book chapter, commentary on TB among Indigenous Australians comparing manifestations of TB in Indigenous and non-Indigenous Australians in the early 1970s.                       | Commentary on TB history, TB experience and approaches to TB control | TB is Balanda disease: <i>Invasion</i>                                                                                               |
| 17 | Thompson JE [56]                                                       | Tuberculosis in Far North Queensland                                   | 1991 | Far north Queensland | Book chapter, commentary describing TB among Indigenous Australians and services in Far North Queensland 1960s-1991.                                                              | Commentary on TB history, TB experience and approaches to TB control | TB is a Balanda disease: <i>Theft and loss of family and culture.</i><br>TB control is complex: <i>Biomedical health models.</i>     |
| 18 | Kettle E [57]                                                          | Tuberculosis in the Northern Territory                                 | 1991 | Northern Territory   | Book chapter, commentary on TB among Indigenous Australians and services in the Northern Territory 1824-1965                                                                      | Commentary on TB history, TB experience and approaches to TB control | TB is Balanda disease: <i>Invasion; Racism.</i><br>TB control is complex: <i>Indigenous health models; Biomedical health models.</i> |
| 19 | Thomson N [54]                                                         | Tuberculosis among Aborigines                                          | 1991 | Australia            | Book chapter, commentary on the history of TB among Indigenous Australians pre 1788-1991.                                                                                         | Commentary on TB history, TB experience and approaches to TB control | TB is Balanda disease: <i>Invasion; Racism.</i>                                                                                      |
| 20 | Pang SC, Clayton AS, Harrison RH. [89]                                 | Culture-positive tuberculosis in Western Australia                     | 1992 | Western Australia    | Journal paper, state TB surveillance report 1980 – 1989.                                                                                                                          | Descriptive epidemiology                                             | TB control is complex: <i>Biomedical health models</i>                                                                               |

|    |                                                                      |                                                                                                                     |      |                         |                                                                                                                                                                                                |                                                                      |                                                                                                                                        |
|----|----------------------------------------------------------------------|---------------------------------------------------------------------------------------------------------------------|------|-------------------------|------------------------------------------------------------------------------------------------------------------------------------------------------------------------------------------------|----------------------------------------------------------------------|----------------------------------------------------------------------------------------------------------------------------------------|
| 21 | Hargrave JC [49]                                                     | The best of both worlds: Aboriginal health then and now                                                             | 1993 | Australia               | Lecture delivered on the history of Aboriginal health and covering the general social condition for Indigenous Australians in 1992.                                                            | Commentary on TB history, TB experience and approaches to TB control | TB is Balanda disease: <i>Invasion; Racism</i> .<br>TB control is complex: <i>Indigenous health models; Biomedical health models</i> . |
| 22 | McIntosh EDG, Isaacs D, Oates RK, Ryan MD, Mansour A, Falk MC. [119] | Extrapulmonary tuberculosis in children                                                                             | 1993 | Sydney, New South Wales | Journal paper, review of children admitted with extrapulmonary TB to the Royal Alexandra Hospital for Children 1982-1991.                                                                      | Descriptive epidemiology                                             | TB control is complex: <i>Biomedical health models</i>                                                                                 |
| 23 | Plant AJ, Krause VL, Condon JR, Kerr C. [90]                         | Aborigines and tuberculosis: why they are at risk                                                                   | 1995 | Australia               | Journal paper, report on TB in Indigenous Australians 1979-1991.                                                                                                                               | Descriptive epidemiology                                             | TB control is complex: <i>Biomedical health models</i>                                                                                 |
| 24 | Dowling PJ [50]                                                      | A great deal of sickness: introduced diseases among the Aboriginal people of colonial southeast Australia 1788-1900 | 1997 | Southeast Australia     | Doctoral dissertation describing the diseases that were introduced to Indigenous Australians in southeast Australia during the process of colonisation 1788-1900.                              | Commentary on TB history, TB experience and approaches to TB control | TB is Balanda disease: <i>Invasion; Racism</i> .<br>TB control is complex: <i>Indigenous health models; Biomedical health models</i> . |
| 25 | Oliver G, Harvey B. [70]                                             | Tuberculosis notifications in Australia, 1995                                                                       | 1997 | Australia               | National TB surveillance report                                                                                                                                                                | Descriptive epidemiology                                             | TB control is complex: <i>Biomedical health models</i>                                                                                 |
| 26 | Gilroy N, Oliver G, Harvey B. [71]                                   | Tuberculosis notifications in Australia, 1996                                                                       | 1998 | Australia               | National TB surveillance report                                                                                                                                                                | Descriptive epidemiology                                             | TB control is complex: <i>Biomedical health models</i>                                                                                 |
| 27 | Kermode M, Crofts N, Miller P, Speed B, Streeton J [112]             | Health indicators and risks among people experiencing homelessness in Melbourne, 1995-1996                          | 1998 | Melbourne, Victoria     | Journal paper, review of the health status, risk factors and extent of TB infection in a representative sample of persons experiencing homelessness in inner metropolitan Melbourne 1995-1996. | Descriptive epidemiology                                             | TB control is complex: <i>Biomedical health models</i>                                                                                 |

|    |                                                          |                                                                                                      |      |                      |                                                                                                                                                                                                                                                                         |                                                                      |                                                                                                            |
|----|----------------------------------------------------------|------------------------------------------------------------------------------------------------------|------|----------------------|-------------------------------------------------------------------------------------------------------------------------------------------------------------------------------------------------------------------------------------------------------------------------|----------------------------------------------------------------------|------------------------------------------------------------------------------------------------------------|
| 28 | Taffe S. [42]                                            | Health, the law and racism: the campaign to amend the discriminatory clauses in the Tuberculosis Act | 1999 | Australia            | Journal paper, case study exploring how and why Indigenous Australians were excluded from the TB Allowance and describing the successful campaign to end the discriminatory clauses in the TB Act of 1948.                                                              | Commentary on TB history, TB experience and approaches to TB control | TB is Balanda disease: <i>Invasion; Racism</i> .<br>TB control is complex: <i>Biomedical health models</i> |
| 29 | Gilroy N. [72]                                           | Tuberculosis notifications in Australia, 1997.                                                       | 1999 | Australia            | National TB surveillance report                                                                                                                                                                                                                                         | Descriptive epidemiology                                             | TB control is complex: <i>Biomedical health models</i>                                                     |
| 30 | Simpson G, Knight T [100]                                | Tuberculosis in Far North Queensland, Australia                                                      | 1999 | Far north Queensland | Journal paper, regional TB surveillance report 1993-1997.                                                                                                                                                                                                               | Descriptive epidemiology                                             | TB control is complex: <i>Biomedical health models</i>                                                     |
| 31 | Butler T, Levy M [110]                                   | Mantoux positivity among prison inmates New South Wales, 1996                                        | 1999 | New South Wales      | Journal paper, Mantoux positivity and risk factors for TB infection among a randomly selected cross-sectional sample of inmates from 27 correctional centres in NSW in 1996.                                                                                            | Descriptive epidemiology                                             | TB control is complex: <i>Biomedical health models</i>                                                     |
| 32 | Taffe S [43]                                             | Making a difference: a 1960s partnership opposing racial discrimination                              | 2000 | Australia            | Journal paper, commentary describing the partnership between Indigenous activist Mr Joe McGuinness and non-Indigenous Dr Barry Christophers to ensure Indigenous Australians could access the TB Allowance and to end the Discriminatory clauses in the TB Act of 1948. | Commentary on TB history, TB experience and approaches to TB control | TB is Balanda disease: <i>Invasion; Racism</i> .<br>TB control is complex: <i>Indigenous health models</i> |
| 33 | Antic RC, J. Christensen, A. Eyeson-Annan, M. et al [73] | Tuberculosis notifications in Australia, 1998                                                        | 2001 | Australia            | National TB surveillance report                                                                                                                                                                                                                                         | Descriptive epidemiology                                             | TB control is complex: <i>Biomedical health models</i>                                                     |
| 34 | Roche P, Merianos A, Antic R et al [74]                  | Tuberculosis notifications in Australia, 1999                                                        | 2001 | Australia            | National TB surveillance report                                                                                                                                                                                                                                         | Descriptive epidemiology                                             | TB control is complex: <i>Biomedical health models</i>                                                     |

|    |                                                                            |                                                                                          |      |                                     |                                                                                                                           |                                                                      |                                                                                                   |
|----|----------------------------------------------------------------------------|------------------------------------------------------------------------------------------|------|-------------------------------------|---------------------------------------------------------------------------------------------------------------------------|----------------------------------------------------------------------|---------------------------------------------------------------------------------------------------|
| 35 | Ward J, Siskind V, Konstantinos A. [91]                                    | Patient and health care system delays in Queensland tuberculosis patients, 1985-1998     | 2001 | Queensland                          | Journal paper, state-wide review of patient and system delays in the diagnosis of active TB 1985-1998.                    | Descriptive epidemiology                                             | TB control is complex: <i>Biomedical health models</i>                                            |
| 36 | Krause V [16]                                                              | TB Community Screening - a new TB threat promotes community action: A Preliminary report | 2002 | Top End of Northern Territory       | Journal paper, regional review of TB screening in an Aboriginal community in 2002.                                        | Descriptive epidemiology                                             | TB control is complex: <i>Indigenous health models;</i> <i>Biomedical health models</i>           |
| 37 | Krause VL [75]                                                             | Update on Top End community fighting TB                                                  | 2002 | Top End of Northern Territory       | Journal paper, report on TB screening in an Aboriginal community in 2002.                                                 | Descriptive epidemiology                                             | TB control is complex: <i>Indigenous health models;</i> <i>Biomedical health models</i>           |
| 38 | Lin M, Spencer J, Roche P, McKinnon M. [75]                                | Tuberculosis notifications in Australia, 2000                                            | 2002 | Australia                           | National TB surveillance report                                                                                           | Descriptive epidemiology                                             | TB control is complex: <i>Biomedical health models</i>                                            |
| 39 | Miller M, Lin M, Spencer J, Antic R, Bastian I, Christensen A, et al. [76] | Tuberculosis notifications in Australia, 2001                                            | 2002 | Australia                           | National TB surveillance report                                                                                           | Descriptive epidemiology                                             | TB control is complex: <i>Biomedical health models</i>                                            |
| 40 | Krause V, Zweck N. [99]                                                    | Tuberculosis in the Northern Territory: highlights from 2000                             | 2002 | Northern Territory                  | Territory TB surveillance report                                                                                          | Descriptive epidemiology                                             | TB control is complex: <i>Biomedical health models</i>                                            |
| 41 | Markey P, Barclay L, Krause V [115]                                        | NT Mantoux school screening 1991-2000                                                    | 2002 | Northern Territory                  | Journal paper, territory-wide review of TB screening in schools 1991-2000.                                                | Descriptive epidemiology                                             | TB control is complex: <i>Biomedical health models</i>                                            |
| 42 | Pascall J, Cooper M [18]                                                   | TB in two Katherine region communities                                                   | 2003 | Katherine region Northern Territory | Journal paper, regional review of treatment of latent TB infection in two Aboriginal communities (no dates).              | Descriptive epidemiology                                             | TB control is complex: <i>Indigenous health models;</i> <i>Biomedical health models</i>           |
| 43 | Murray R [59]                                                              | Disease - the real invader                                                               | 2003 | Australia                           | Journal paper reviewing historians' views on frontier conflict between Indigenous Australians and Europeans in Australia. | Commentary on TB history, TB experience and approaches to TB control | TB is Balanda disease: <i>Invasion</i> . TB control is complex: <i>Indigenous health models</i> . |

|    |                                                                                |                                                                                                                                            |      |            |                                                                                                                                                                                     |                                                                      |                                                                                                           |
|----|--------------------------------------------------------------------------------|--------------------------------------------------------------------------------------------------------------------------------------------|------|------------|-------------------------------------------------------------------------------------------------------------------------------------------------------------------------------------|----------------------------------------------------------------------|-----------------------------------------------------------------------------------------------------------|
| 44 | Samaan G, Roche P, Spencer J, Bastian I, Christensen A, Hurwitz M, et al. [77] | Tuberculosis notifications in Australia, 2002                                                                                              | 2003 | Australia  | National TB surveillance report                                                                                                                                                     | Descriptive epidemiology                                             | TB control is complex: <i>Biomedical health models</i>                                                    |
| 45 | Walpole HC, Siskind V, Patel AM, Konstantinos A, Derhy P [92]                  | Tuberculosis-related deaths in Queensland, Australia, 1989-1998: characteristics and risk factors                                          | 2003 | Queensland | Journal paper, state-wide review of factors associated with TB-related deaths between 1989 and 1998.                                                                                | Descriptive epidemiology                                             | TB control is complex: <i>Biomedical health models</i>                                                    |
| 46 | Thomas DP [44]                                                                 | The upsurge of interest in Indigenous health in the 1950s and 1960s. Barry Christophers' letters to the MJA editor about Indigenous health | 2004 | Australia  | Journal paper, commentary on publication on Indigenous Australian health describing Dr Barry Christophers' advocacy letters to the editor of the MJA.                               | Commentary on TB history, TB experience and approaches to TB control | TB is a Balanda disease: <i>Invasion; Racism</i> . TB control is complex: <i>Biomedical health models</i> |
| 47 | Ramsland J [60]                                                                | Bringing up Harry Penrith: injustice and becoming Burnum Burnum: the formative years of a child of the Stolen Generation                   | 2004 | N/A        | Journal paper, case study describing the life of Aboriginal activist Burnum Burnum whose mother was suffering from TB at the time of his birth in southern New South Wales in 1936. | Commentary on TB history, TB experience and approaches to TB control | TB is a Balanda disease: <i>Theft and loss of family and culture</i> .                                    |
| 48 | Li J, Roche P, Spencer J, Bastian I, Christensen A, Hurwitz M, et al. [78]     | Tuberculosis notifications in Australia, 2003                                                                                              | 2004 | Australia  | National TB surveillance report                                                                                                                                                     | Descriptive epidemiology                                             | TB control is complex: <i>Biomedical health models</i>                                                    |

|    |                                      |                                                                                                                                          |      |                                |                                                                                                                                                                                                         |                                                                      |                                                                                                                                     |
|----|--------------------------------------|------------------------------------------------------------------------------------------------------------------------------------------|------|--------------------------------|---------------------------------------------------------------------------------------------------------------------------------------------------------------------------------------------------------|----------------------------------------------------------------------|-------------------------------------------------------------------------------------------------------------------------------------|
| 49 | Wallace T, Williams M, Krause V [19] | Results of contact tracing following transmission of Mycobacterium tuberculosis in an urban itinerant Aboriginal population in Australia | 2005 | Darwin Northern Territory      | Journal paper, regional review of TB contact tracing urban itinerant Aboriginal population 1998 - (no date).                                                                                            | Descriptive epidemiology                                             | TB control is complex: <i>Biomedical health models</i>                                                                              |
| 50 | Taffe S [45]                         | Black and white together FCAATSI : the Federal Council for the Advancement of Aborigines and Torres Strait Islanders, 1958-1973          | 2005 | Australia                      | Book describing an Australian Indigenous civil rights organisation, activists and their achievements. Outlines the successful campaign to have discriminatory clauses in the TB Act of 1948.            | Commentary on TB history, TB experience and approaches to TB control | TB is Balanda disease: <i>Racism</i> .                                                                                              |
| 51 | Grace J, Chenhall R [40]             | A rapid anthropological assessment of tuberculosis in a remote Aboriginal community in Northern Australia                                | 2006 | Maningrida, Northern Territory | Journal paper, qualitative research including semi-structured interviews individuals and focus groups with Indigenous and non-Indigenous Australians in Maningrida in the Northern Territory 2003-2004. | Qualitative research                                                 | TB is Balanda disease: <i>Invasion; Racism</i> . TB control is complex: <i>Indigenous health models; Biomedical health models..</i> |
| 52 | Brennan S, Craven Z [46]             | Eventually they get it all': government management of Aboriginal trust money in New South Wales (Research Paper No. 2007-45)             | 2006 | New South Wales                | Journal paper examining the Government's management of Aboriginal trust money in New South Wales.                                                                                                       | Commentary on TB history, TB experience and approaches to TB control | TB is Balanda disease: <i>Racism</i> .                                                                                              |
| 53 | Fitzgerald C [63]                    | Kissing can be dangerous: the public health campaigns to prevent and control tuberculosis in Western Australia, 1900-1960.               | 2006 | Western Australia              | Book, commentary on the response of Australian public health officials to prevent and control TB in Western Australia 1900-1960.                                                                        | Commentary on TB history, TB experience and approaches to TB control | TB is Balanda disease: <i>Invasion; Racism</i> . TB control is complex: <i>Biomedical health models</i> .                           |



|    |                                                                              |                                                                                    |      |                                       |                                                                                                                                                                                                        |                                                                      |                                                                                                                                                                           |
|----|------------------------------------------------------------------------------|------------------------------------------------------------------------------------|------|---------------------------------------|--------------------------------------------------------------------------------------------------------------------------------------------------------------------------------------------------------|----------------------------------------------------------------------|---------------------------------------------------------------------------------------------------------------------------------------------------------------------------|
| 54 | Roche PW, Antic R, Bastian I, Brown L, Christensen A, Hurwitz M, et al. [79] | Tuberculosis notifications in Australia, 2004                                      | 2006 | Australia                             | National TB surveillance report                                                                                                                                                                        | Descriptive epidemiology                                             | TB control is complex: <i>Biomedical health models</i>                                                                                                                    |
| 55 | Simpson C, Knight T, Clark P [101]                                           | Changing patterns of tuberculosis in Far North Queensland                          | 2006 | Far north Queensland                  | Letter to the editor of MJA reporting the findings of an audit of TB cases 1993-2002.                                                                                                                  | Descriptive epidemiology                                             | TB control is complex: <i>Biomedical health models</i>                                                                                                                    |
| 56 | Graham J, Farmer B, Kennon H, Krause V [116]                                 | Northern Territory school screening 2003-2005                                      | 2006 | Northern Territory                    | Journal paper, territory-wide review of TB screening in schools 2003-2005.                                                                                                                             | Descriptive epidemiology                                             | TB control is complex: <i>Biomedical health models</i>                                                                                                                    |
| 57 | Campbell J [51]                                                              | Invisible Invaders: Smallpox and Other Diseases in Aboriginal Australia, 1780-1880 | 2007 | Australia                             | Book describing the impact of infectious diseases on Indigenous Australians in the 100 years after the arrival of Europeans in 1788.                                                                   | Commentary on TB history, TB experience and approaches to TB control | TB is Balanda disease: <i>Invasion; Theft and loss of family and culture.</i><br>TB control is complex: <i>Indigenous health models.</i>                                  |
| 55 | Kenny R [61]                                                                 | The Lamb enters the Dreaming : Nathanael Pepper and the ruptured world             | 2007 | Victoria                              | Book analysing the life of Nathaniel Pepper of the Wotjobaluk people. Death and suffering from TB feature in this narrative about the collision of cultures for Australia's First Peoples in Victoria. | Commentary on TB history, TB experience and approaches to TB control | TB is Balanda disease: <i>Invasion; Racism; Theft and loss of family and culture.</i><br>TB control is complex: <i>Indigenous health models; Biomedical health models</i> |
| 58 | Bastian I, Krause V, Roche P, et al. [80]                                    | Tuberculosis notifications in Australia, 2005                                      | 2007 | Australia                             | National TB surveillance report                                                                                                                                                                        | Descriptive epidemiology                                             | TB control is complex: <i>Biomedical health models</i>                                                                                                                    |
| 60 | Schultz R. [105]                                                             | HTLV-1 infection and tuberculosis (TB) in Central Australian Aboriginal people     | 2007 | Central Australia, Northern Territory | Journal paper, regional review of HTLV-1 among Central Australian Aboriginal people with a diagnosis of TB 1991-2007.                                                                                  | Descriptive epidemiology                                             | TB control is complex: <i>Biomedical health models</i>                                                                                                                    |

|    |                                                   |                                                                                                                            |      |                               |                                                                                                                                                                                          |                                                                      |                                                                                                            |
|----|---------------------------------------------------|----------------------------------------------------------------------------------------------------------------------------|------|-------------------------------|------------------------------------------------------------------------------------------------------------------------------------------------------------------------------------------|----------------------------------------------------------------------|------------------------------------------------------------------------------------------------------------|
| 61 | Levy M, Butler T, Zhao J [111]                    | Prevalence of Mantoux positivity and annual risk of infection for tuberculosis in New South Wales prisoners, 1996 and 2001 | 2007 | New South Wales               | Journal paper comparing the prevalence of Mantoux positivity and examining factors associated with tuberculosis infection among prisoners in NSW correctional centres in 1996 and 2001.  | Descriptive epidemiology                                             | TB control is complex:<br><i>Biomedical health models</i>                                                  |
| 62 | Coleman K, Stephenson E, Krause V [20]            | Top End TB outbreak                                                                                                        | 2008 | Top End of Northern Territory | Journal paper, regional review of a TB outbreak in an Aboriginal community in the Top End of the Northern Territory in 2008.                                                             | Descriptive epidemiology                                             | TB control is complex:<br><i>Biomedical health models</i>                                                  |
| 63 | Bastian I, Krause VL [64]                         | Tuberculosis: The dis-ease that didn't dis-appear                                                                          | 2008 | Australia                     | Journal paper, commentary on the challenges of controlling TB in Australia.                                                                                                              | Commentary on TB history, TB experience and approaches to TB control | TB is Balanda disease:<br><i>Invasion; Racism</i>                                                          |
| 64 | Krause V, Bastian I, Konstantinos A, Roche P [81] | Tuberculosis notifications in Australia, 2006                                                                              | 2008 | Australia                     | National TB surveillance report                                                                                                                                                          | Descriptive epidemiology                                             | TB control is complex:<br><i>Biomedical health models</i>                                                  |
| 65 | Queensland Tuberculosis Control Centre [93]       | Biennial Report 2006/2007                                                                                                  | 2008 | Queensland                    | State TB surveillance report 2006-2007.                                                                                                                                                  | Descriptive epidemiology                                             | TB control is complex:<br><i>Biomedical health models</i>                                                  |
| 66 | Schultz R [21]                                    | Tuberculosis transmission within a single household - a report of a cluster of 11 cases                                    | 2009 | Northern Territory            | Journal paper, review of TB cases in an Aboriginal household 1983-2008.                                                                                                                  | Descriptive epidemiology                                             | TB control is complex:<br><i>Biomedical health models</i>                                                  |
| 67 | Stylianou M [47]                                  | 'A scandal which must be corrected'. Reconsidering the success of the Australian Tuberculosis Campaign                     | 2009 | Australia                     | Journal paper exploring the concept of civic responsibility as a reason for the striking disparity in TB Campaign outcomes between Victoria's Indigenous and non-Indigenous populations. | Commentary on TB history, TB experience and approaches to TB control | TB is a Balanda disease:<br><i>Racism</i> .<br>TB control is complex:<br><i>Biomedical health models</i> . |
| 68 | Barry C, Konstantinos A [82]                      | Tuberculosis notifications in Australia, 2007                                                                              | 2009 | Australia                     | National TB surveillance report                                                                                                                                                          | Descriptive epidemiology                                             | TB control is complex:<br><i>Biomedical health models</i>                                                  |

|    |                                                           |                                                                                                             |      |                               |                                                                                                                                                                                                                                                                                                                                      |                                                                      |                                                                                                                                                   |
|----|-----------------------------------------------------------|-------------------------------------------------------------------------------------------------------------|------|-------------------------------|--------------------------------------------------------------------------------------------------------------------------------------------------------------------------------------------------------------------------------------------------------------------------------------------------------------------------------------|----------------------------------------------------------------------|---------------------------------------------------------------------------------------------------------------------------------------------------|
| 69 | O'Connor BAF, L.L. Christensen, A.J. McAnulty, J.M [94]   | Tuberculosis in NSW, 2003-2007                                                                              | 2009 | New South Wales               | State TB surveillance report 2003–2007.                                                                                                                                                                                                                                                                                              | Descriptive epidemiology                                             | TB control is complex: <i>Biomedical health models</i>                                                                                            |
| 70 | McCalman J, Smith L, Anderson I, Morley R, Mishra G [123] | Colonialism and the health transition: Aboriginal Australians and poor whites compared, Victoria, 1850-1985 | 2009 | Victoria                      | Journal paper, comparison of an Aboriginal population dataset and an impoverished European dataset against events, policy interventions and socio-economic change with special reference to Victoria. Survival analysis was performed for both populations, and infant mortality and tuberculosis mortality were analysed 1850-1985. | Descriptive epidemiology                                             | TB is a Balanda disease: <i>Racism</i> . TB control is complex: <i>Biomedical health models</i>                                                   |
| 71 | Stephenson L [22]                                         | Top End TB outbreak update - a household connection - what's been happening?                                | 2010 | Top End of Northern Territory | Journal paper, regional review of a TB outbreak in an Aboriginal community in the Top end of the Northern Territory in 2008-2010.                                                                                                                                                                                                    | Descriptive epidemiology                                             | TB control is complex: <i>Biomedical health models</i>                                                                                            |
| 72 | Bashford A [65]                                           | The Great White Plague Turns Alien: Tuberculosis and Immigration in Australia, 1901-2001                    | 2010 | Australia                     | Book chapter, commentary tracing the conceptualisation of TB from the late 1800s to 2001.                                                                                                                                                                                                                                            | Commentary on TB history, TB experience and approaches to TB control | TB is Balanda disease: <i>Racism</i> . TB control in complex: <i>Biomedical health models</i> .                                                   |
| 73 | Robertus LM, Konstantinos A, Hayman NE, Paterson DL [113] | Tuberculosis in the Australian Indigenous population: history, current situation and future challenges      | 2011 | Australia                     | Journal paper, commentary on TB in Indigenous Australians.                                                                                                                                                                                                                                                                           | Commentary on TB history, TB experience and approaches to TB control | TB is Balanda disease: <i>Invasion; Racism</i> . TB control is complex: <i>Biomedical health models</i>                                           |
| 74 | Smith FB [62]                                             | Illness in colonial Australia                                                                               | 2011 | Australia                     | Book commentary on the impact of illnesses on people on the Australian landmass through the colonial period. Chapter 7 focuses on TB, cancer and the health transition for Australia's First Peoples.                                                                                                                                | Commentary on TB history, TB experience and approaches to TB control | TB is a Balanda disease: <i>Invasion; Racism; Theft and loss of family and culture</i> . TB control is complex: <i>Biomedical health models</i> . |

|    |                                                                  |                                                                                                 |      |                                     |                                                                                                                                                                                                             |                                                                      |                                                                                  |
|----|------------------------------------------------------------------|-------------------------------------------------------------------------------------------------|------|-------------------------------------|-------------------------------------------------------------------------------------------------------------------------------------------------------------------------------------------------------------|----------------------------------------------------------------------|----------------------------------------------------------------------------------|
| 75 | Dobler CC, McDonald SP, Marks GB [113]                           | Risk of tuberculosis in dialysis patients: A nationwide cohort study                            | 2011 | Australia                           | Journal paper identifying the risk of TB arising in people on chronic haemo- or peritoneal dialysis. Whole population historical cohort study conducted in all Australian States and Territories 2001-2006. | Descriptive epidemiology                                             | TB control is complex: <i>Biomedical health models</i>                           |
| 76 | Barry C, Waring J, Stapledon R, Konstantinos A [83]              | Tuberculosis notifications in Australia, 2008 and 2009                                          | 2012 | Australia                           | National TB surveillance report                                                                                                                                                                             | Descriptive epidemiology                                             | TB control is complex: <i>Biomedical health models</i>                           |
| 77 | Tollefson D, Bloss E, Fanning A, Redd JT, Barker K, McCray E [2] | Burden of tuberculosis in indigenous peoples globally: a systematic review                      | 2013 | Global                              | Journal paper, literature review of the TB disease burden in Indigenous populations worldwide. Systematic review of literature published between January 1990 and November 2011.                            | Descriptive epidemiology                                             | TB control is complex: <i>Indigenous health models; Biomedical health models</i> |
| 78 | Devlin S, Passmore E [23]                                        | Ongoing transmission of tuberculosis in Aboriginal communities in NSW                           | 2013 | Northern New South Wales            | Journal paper, regional review of an outbreak of TB in Aboriginal communities in northern New South Wales 2000 – 2012.                                                                                      | Descriptive epidemiology                                             | TB control is complex: <i>Indigenous health models; Biomedical health models</i> |
| 79 | Lowbridge C, Christensen A, McAnulty JM [95]                     | EpiReview: tuberculosis in NSW, 2009-2011                                                       | 2013 | New South Wales                     | State TB surveillance report 2009-2011.                                                                                                                                                                     | Descriptive epidemiology                                             | TB control is complex: <i>Biomedical health models</i>                           |
| 80 | Gaffney V, Douglas C, KrauseV [24]                               | TB in Katherine region 2011-2013                                                                | 2014 | Katherine region Northern Territory | Regional review of TB cases 2011-2013.                                                                                                                                                                      | Descriptive epidemiology                                             | TB control is complex: <i>Biomedical health models</i>                           |
| 81 | Roberts-Thomson PJ [52]                                          | Impact of introduced disease into Tasmanian Aboriginal populations and its role in depopulation | 2014 | Tasmania                            | Journal paper, critical examination of the theme of excessive mortality for the Tasmanian Aboriginal population resulting from introduced diseases including TB.                                            | Commentary on TB history, TB experience and approaches to TB control | TB is a Balanda disease: <i>Invasion; Theft and loss of family and culture.</i>  |

|    |                                                                           |                                                                                                                                               |      |                          |                                                                                                               |                          |                                                                                  |
|----|---------------------------------------------------------------------------|-----------------------------------------------------------------------------------------------------------------------------------------------|------|--------------------------|---------------------------------------------------------------------------------------------------------------|--------------------------|----------------------------------------------------------------------------------|
| 82 | Bareja C, Waring J, Stapledon R [84]                                      | Tuberculosis notifications in Australia, 2010                                                                                                 | 2014 | Australia                | National TB surveillance report                                                                               | Descriptive epidemiology | TB control is complex: <i>Biomedical health models</i>                           |
| 83 | Bareja C, Waring J, Stapledon R, Toms C, Douglas P [85]                   | Tuberculosis notifications in Australia, 2011                                                                                                 | 2014 | Australia                | National TB surveillance report                                                                               | Descriptive epidemiology | TB control is complex: <i>Biomedical health models</i>                           |
| 84 | Lowbridge C [96]                                                          | Informing the control of communicable diseases. Chapter 5 Chapter 5: Delay in the diagnosis and treatment of tuberculosis in New South Wales. | 2014 | New South Wales          | Thesis chapter reporting state-wide review of delay in the diagnosis and treatment of tuberculosis 2009-2011. | Descriptive epidemiology | TB control is complex: <i>Biomedical health models</i>                           |
| 85 | Visser H, Devlin S, Passey M, Douglas M, Reinten T, Blunden S, et al [25] | A screening project for latent Tuberculosis infection offered by an Aboriginal Community Controlled Health Service in Northern NSW            | 2015 | Northern New South Wales | Poster, analysis of a partnership model for finding and preventing TB cases in Aboriginal people.             | Descriptive epidemiology | TB control is complex: <i>Indigenous health models; Biomedical health models</i> |
| 86 | Toms C, Stapledon R, Waring J, Douglas P [86]                             | Tuberculosis notifications in Australia, 2012 and 2013                                                                                        | 2015 | Australia                | National TB surveillance report                                                                               | Descriptive epidemiology | TB control is complex: <i>Biomedical health models</i>                           |
| 87 | NSW Department of Health [97]                                             | TB report 2012-2014                                                                                                                           | 2015 | New South Wales          | State TB surveillance report 2012-2014.                                                                       | Descriptive epidemiology | TB control is complex: <i>Biomedical health models</i>                           |
| 88 | Queensland Department of Health [98]                                      | Tuberculosis in Queensland 2011 - 2012                                                                                                        | 2015 | Queensland               | State TB surveillance report 2011-2012.                                                                       | Descriptive epidemiology | TB control is complex: <i>Biomedical health models</i>                           |

|    |                                                                         |                                                                                                              |      |                            |                                                                                                  |                          |                                                                                  |
|----|-------------------------------------------------------------------------|--------------------------------------------------------------------------------------------------------------|------|----------------------------|--------------------------------------------------------------------------------------------------|--------------------------|----------------------------------------------------------------------------------|
| 89 | Bridson T, Matthiesson A, Owens L, Govan B, Norton R, Ketheesan N [114] | Diabetes: A contributor to tuberculosis in tropical Australia                                                | 2015 | North Queensland           | Journal paper, examining diabetes as a risk factor associated with TB 1995-2014.                 | Descriptive epidemiology | TB control is complex: <i>Biomedical health models</i>                           |
| 90 | Teo SS, Tay EL, Douglas P, Krause VL, Graham SM [120]                   | The epidemiology of tuberculosis in children in Australia, 2003-2012                                         | 2015 | Australia                  | Journal paper, Australia-wide review of paediatric TB 2003-2012.                                 | Descriptive epidemiology | TB control is complex: <i>Biomedical health models</i>                           |
| 91 | Di Palma M, Krause V [122]                                              | Notifiable diseases in Indigenous Australians in the NT: are we closing the gap?.                            | 2015 | Northern Territory         | Journal paper, territory report on notifiable disease rates in Indigenous Australians 2000-2014. | Descriptive epidemiology | TB control is complex: <i>Biomedical health models</i>                           |
| 92 | Toms C, Stapledon R, Coulter C, Douglas P, et al [87]                   | TB notifications Australia, 2014                                                                             | 2017 | Australia                  | National TB surveillance report                                                                  | Descriptive epidemiology | TB control is complex: <i>Biomedical health models</i>                           |
| 93 | Boyd R, Johnston V, Farmer, B, Krause VL [103]                          | Treatment of latent tuberculosis infections in the Darwin region                                             | 2017 | Darwin, Northern Territory | Journal paper, regional review of latent TB treatment outcomes 2013- 2014.                       | Descriptive epidemiology | TB control is complex: <i>Indigenous health models; Biomedical health models</i> |
| 94 | Donnan E, Coulter C, Simpson G, Clark J, Nourse C [121]                 | Paediatric tuberculosis in Queensland, Australia: overrepresentation of cross-border and Indigenous children | 2017 | Queensland                 | State-wide review of paediatric TB 2005-2014.                                                    | Descriptive epidemiology | TB control is complex: <i>Biomedical health models</i>                           |
| 95 | Wilson M, Weston J, Mullen A, Knight T, Simpson G [102]                 | Tuberculosis in Far North Queensland, Australia: a retrospective clinical audit                              | 2018 | Far north Queensland       | Regional TB epidemiology report 2006-2016.                                                       | Descriptive epidemiology | TB control is complex: <i>Indigenous health models; Biomedical health models</i> |
